# Supplementary material
Source: Research Square preprint supplement (doi:10.21203/rs.3.rs-9707506/v1)
Supplement: Supplementary file 1 [file 02a210d7800de192505d85b9.docx]

Tables

Table 1. Descriptive profile of the study population.

|  | **n** | **%** |
| --- | --- | --- |
| Gender |  |  |
| Male | 31 | 64.6 |
| Female | 17 | 35.4 |
| Dominant hand |  |  |
| Right | 48 | 100.0 |
| Left | 0 | 0.0 |
| Medical students | 48 | 100.0 |

Table 2. Time and error analysis.

| **Task** | **Group A** | | | **Group B** | | |
| --- | --- | --- | --- | --- | --- | --- |
| **2D HD** | **3D HD** | **p value** | **2D HD** | **3D HD** | **p value** |
| Cylinder positioning Time (seconds) Errors | 342.7 4.9 | 230.0 2.9 | <0.001 <0.001 | 272.8 3.8 | 268.4 3.0 | 0.861 0.222 |
| Pearl transfer Time (seconds) Errors | 215.5 3.7 | 162.5 1.2 | 0.001 <0.001 | 176.1 2.6 | 176.1 1.3 | 0.997 0.035 |
| Needle capping Time (seconds) Errors | 130.8 14.1 | 80.5 9.5 | 0.002 <0.001 | 89.4 12.2 | 64.9 8.9 | 0.011 0.004 |
| Knots and suturing Time (seconds) Errors | 381.9 19.7 | 296.8 13.9 | 0.002 <0.001 | 414.9 18.4 | 347.8 16.4 | 0.087 0.332 |

Table 3. Initial performance comparison between participants who started with 2D versus 3D HD visualization.

| **Task** | **2D HD** **Group A** | **3D HD** **Group B** | **p value** |
| --- | --- | --- | --- |
| Cylinder positioning Time (seconds) Errors | 342.7 4.9 | 268.4 3.0 | 0.019 0.009 |
| Pearl transfer Time (seconds) Errors | 215.5 3.7 | 176.1 1.3 | 0.084 0.001 |
| Needle capping Time (seconds) Errors | 130.8 14.1 | 64.9 8.9 | 0.001 0.002 |
| Knots and suturing Time (seconds) Errors | 362.7 18.6 | 348.6 17.2 | 0.669 0.645 |

Table 4. Participant preference and reported discomfort according to visualization modality during laparoscopic tasks.

|  | **n (%)** |
| --- | --- |
| Better depth perception (n = 48) 3D HD visualization 2D HD visualization | 47 (97.9) 1 (2.1) |
| Better performance and more accurate gestures 3D HD visualization 2D HD visualization | 38 (79.2) 10 (20.8) |
| Faster task execution 3D HD visualization 2D HD visualization | 41 (85.4) 7 (14.6) |
| More natural visual adaptation 3D HD visualization 2D HD visualization | 25 (52.1) 23 (47.9) |
| Reported adverse symptoms Dizziness Blurred vision Headache Pain during instrument manipulation No adverse symptoms | 4 (8.3) 12 (25.0) 0 (0.0) 16 (33.3) 16 (33.3) |
